# Supplementary material
Source: Springer Nature journal article supplement (https://www.springermedizin.de/resource/supplementary/13014_2011_482_MOESM2_ESM.pdf/9633518)

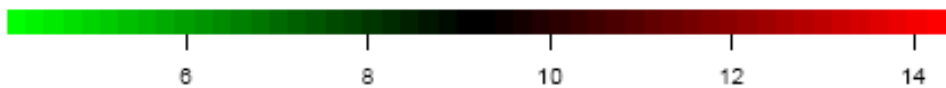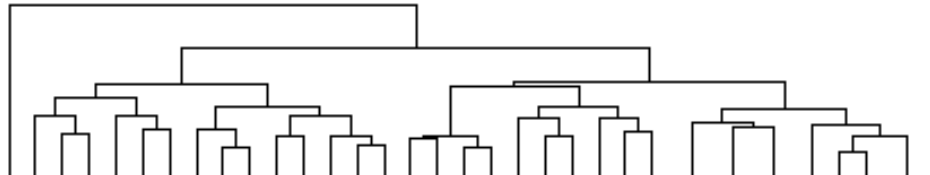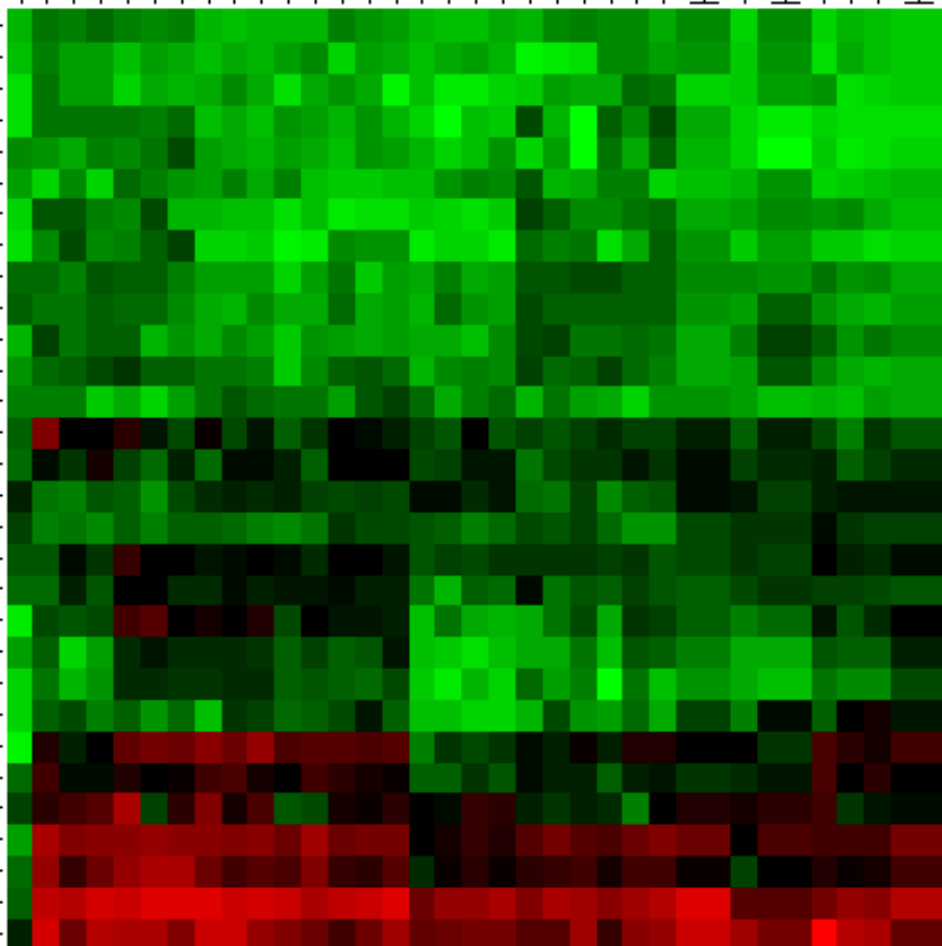

S L L S S L L L L L L L L L L S S L L S S S L L S S L S L L S S S S L

Pattern 1

Pattern 2

Supplement: MOESM2 [file 9633518]
